# Supplementary material
Source: PubMed Central journal article supplement (PMC4618498)
Supplement: NIHMS721594-supplement-1.pdf [file NIHMS721594-supplement-1.pdf]

## SUPPLEMENTAL DATA

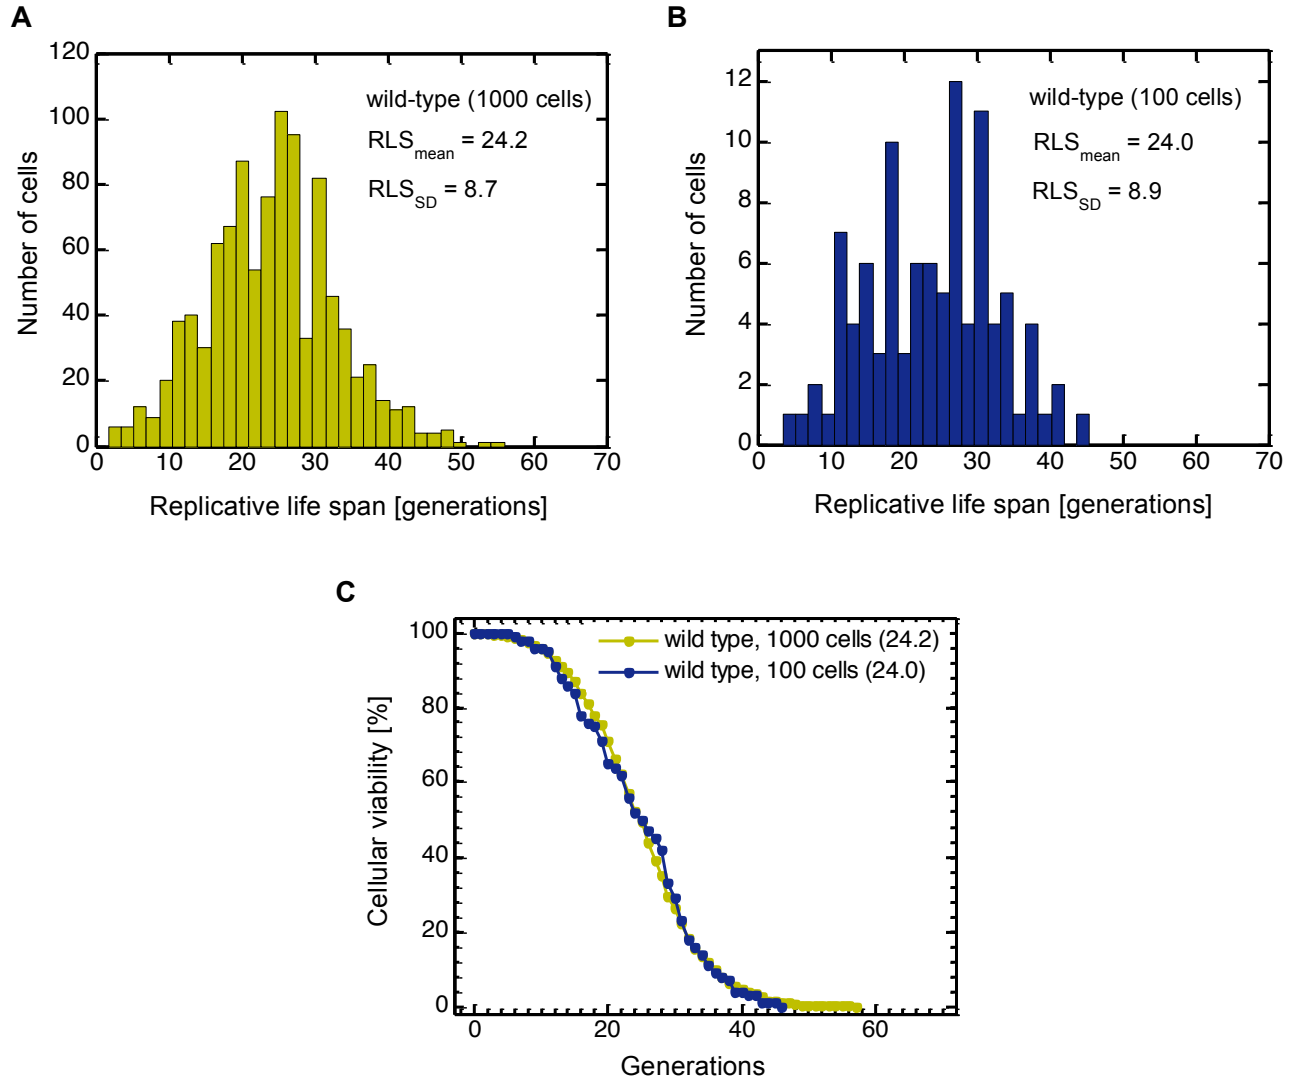

**Figure S1. Replicative life spans and viability curves for 1000 and 100 cells, Related to Figure 3. A-B.** Histogram distributions of single-cell replicative life spans for 1000 (A) and 100 (B) mother cells analyzed. 100 cells were randomly picked from 1000 cells by using MATLAB's *rand* function. **C.** Cellular viability as a function of number of generations for the two cases.

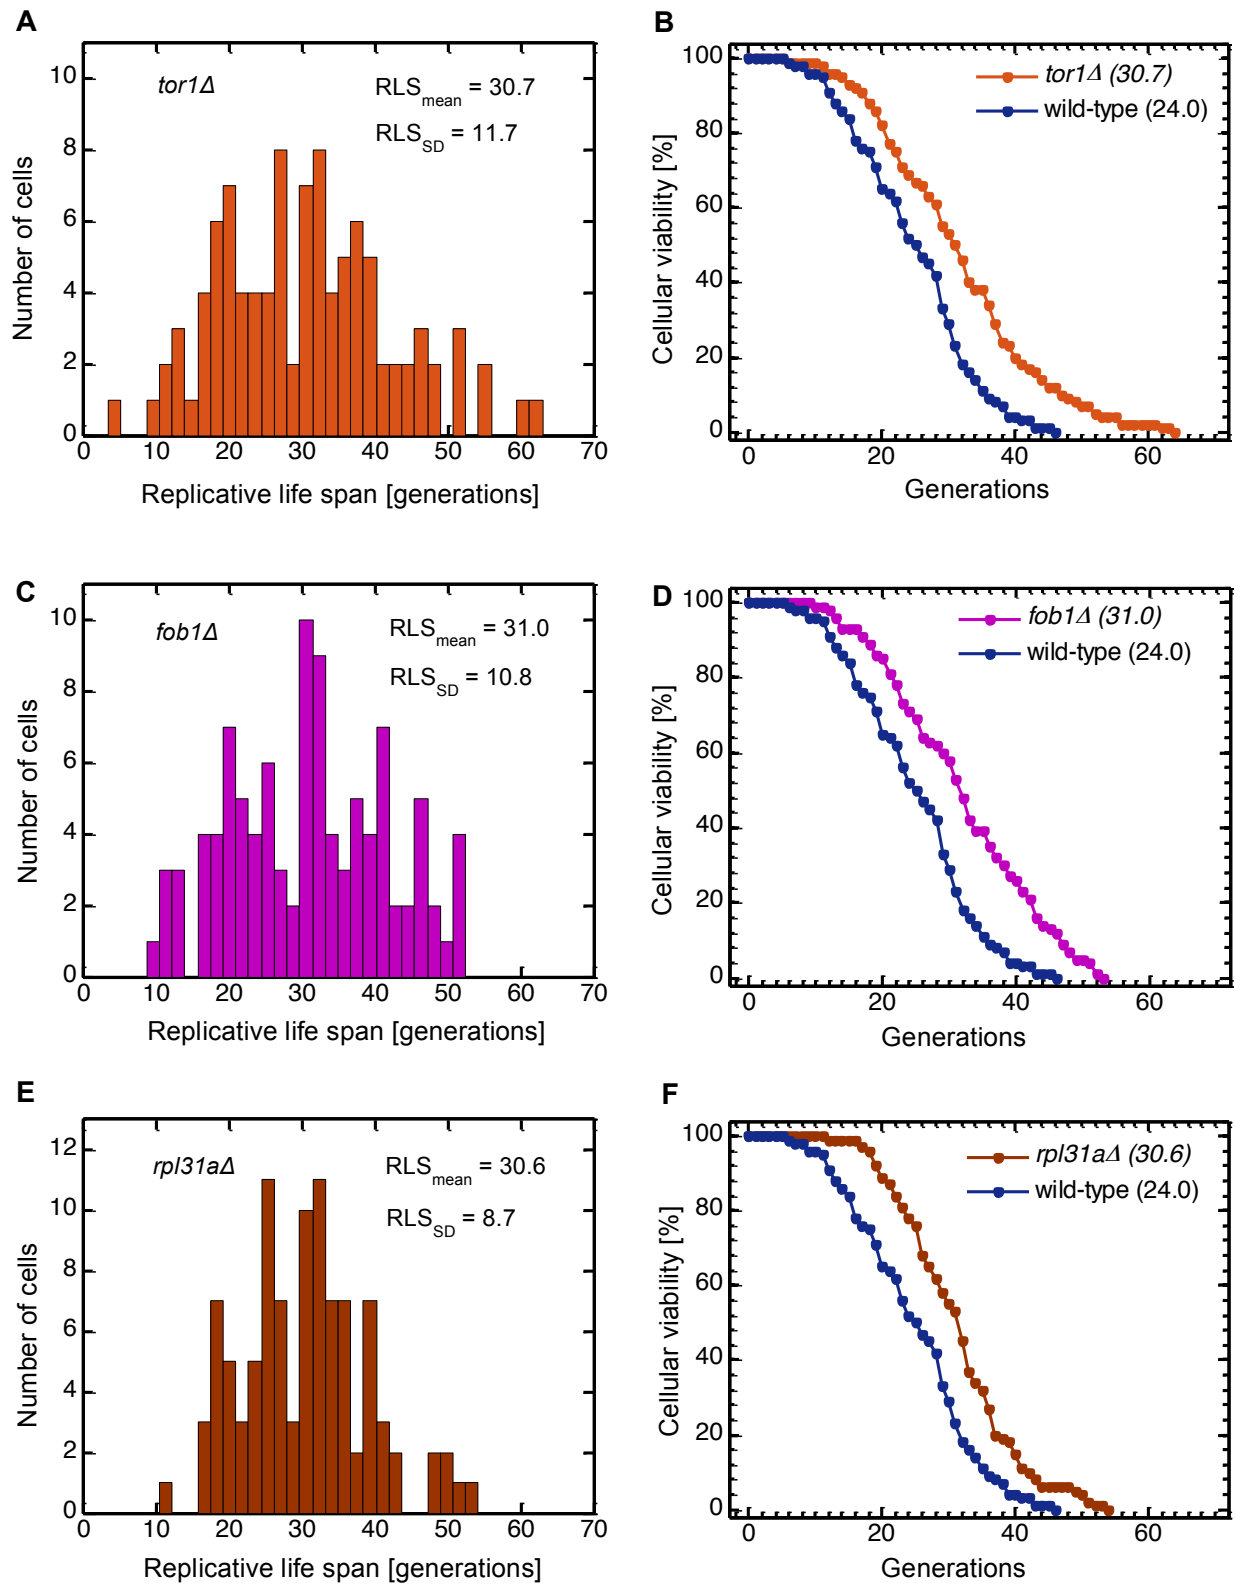

**Figure S2. Canonical gene deletion strains compared to wild type, Related to Figure 3.** Distributions of replicative life spans (left) and viability curves (right). N=100 cells.

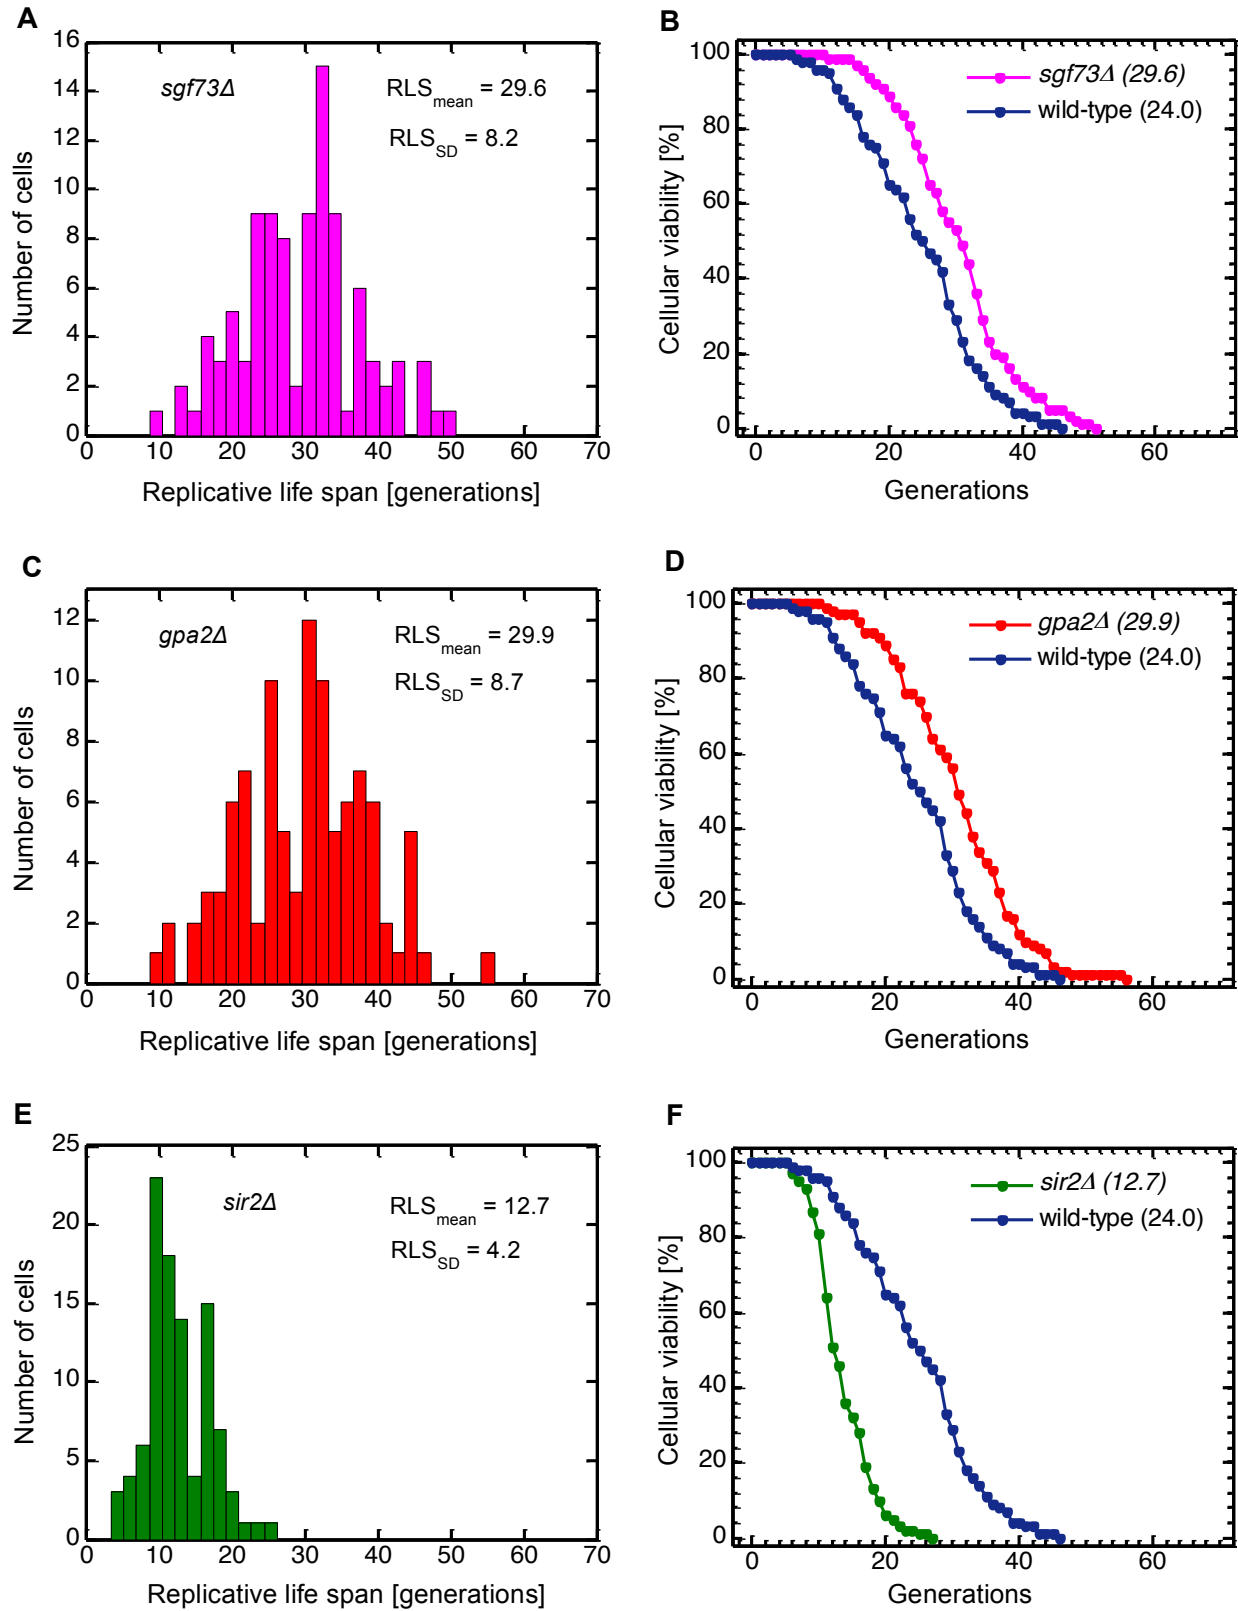

**Figure S3. Canonical gene deletion strains compared to wild type, Related to Figure 3.** Distributions of replicative life spans (left) and viability curves (right). N=100 cells.

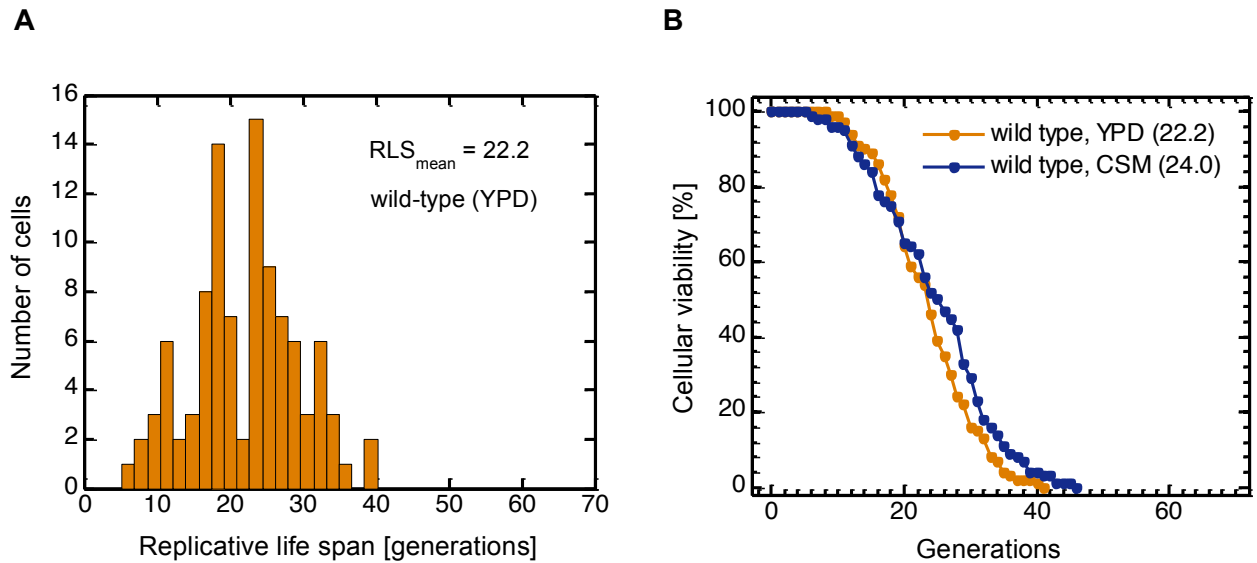

**Figure S4, Lifespan measurements in rich media, Related to Figure 3. A.** Histogram distribution of single-cell replicative life spans for one hundred wild type mother cells tracked in rich YPD media. Mean and SD of the distribution are 22.2 and 7.3. **B.** Cellular viability curve of the YPD-grown cells compared to the curve obtained from mother cells grown in CSM minimal media. Both media types contained 2% glucose.

| <b>Strain</b>                    | <b>Genotype</b>                                                                                                                                                                                                                  |
|----------------------------------|----------------------------------------------------------------------------------------------------------------------------------------------------------------------------------------------------------------------------------|
| AL002                            | <i>MAT<math>\alpha</math></i> , <i>MAT<math>\alpha</math></i> , <i>his3<math>\Delta</math></i> , <i>leu2<math>\Delta</math></i> , <i>LYS2</i> , <i>met15<math>\Delta</math></i> , <i>ura3<math>\Delta</math></i>                 |
| TZY10a                           | <i>MAT<math>\alpha</math></i> , <i>his3<math>\Delta</math></i> , <i>leu2<math>\Delta</math></i> , <i>LYS2</i> , <i>met15<math>\Delta</math></i> , <i>ura3<math>\Delta</math></i> , <i>ho::HIS5-P<sub>GAL1</sub>-YFP</i>          |
| TZY54a                           | <i>MAT<math>\alpha</math></i> , <i>his3<math>\Delta</math></i> , <i>leu2<math>\Delta</math></i> , <i>LYS2</i> , <i>met15<math>\Delta</math></i> , <i>ura3<math>\Delta</math></i> , <i>ho::HIS5-P<sub>SOD1</sub>-mCherry</i>      |
| BY4741                           | <i>MAT<math>\alpha</math></i> , <i>MAT<math>\alpha</math></i> , <i>his3<math>\Delta</math></i> , <i>leu2<math>\Delta</math></i> , <i>LYS2</i> , <i>met15<math>\Delta</math></i> , <i>ura3<math>\Delta</math></i>                 |
| BY4742                           | <i>MAT<math>\alpha</math></i> , <i>MAT<math>\alpha</math></i> , <i>his3<math>\Delta</math></i> , <i>leu2<math>\Delta</math></i> , <i>lys2</i> , <i>MET15</i> , <i>ura3<math>\Delta</math></i>                                    |
| <i>fob1<math>\Delta</math></i>   | <i>MAT<math>\alpha</math></i> , <i>MAT<math>\alpha</math></i> , <i>his3<math>\Delta</math></i> , <i>leu2<math>\Delta</math></i> , <i>lys2</i> , <i>MET15</i> , <i>ura3<math>\Delta</math></i> , <i>fob1<math>\Delta</math></i>   |
| <i>sgf73<math>\Delta</math></i>  | <i>MAT<math>\alpha</math></i> , <i>MAT<math>\alpha</math></i> , <i>his3<math>\Delta</math></i> , <i>leu2<math>\Delta</math></i> , <i>lys2</i> , <i>MET15</i> , <i>ura3<math>\Delta</math></i> , <i>sgf73<math>\Delta</math></i>  |
| <i>tor1<math>\Delta</math></i>   | <i>MAT<math>\alpha</math></i> , <i>MAT<math>\alpha</math></i> , <i>his3<math>\Delta</math></i> , <i>leu2<math>\Delta</math></i> , <i>lys2</i> , <i>MET15</i> , <i>ura3<math>\Delta</math></i> , <i>tor1<math>\Delta</math></i>   |
| <i>sir2<math>\Delta</math></i>   | <i>MAT<math>\alpha</math></i> , <i>MAT<math>\alpha</math></i> , <i>his3<math>\Delta</math></i> , <i>leu2<math>\Delta</math></i> , <i>lys2</i> , <i>MET15</i> , <i>ura3<math>\Delta</math></i> , <i>sir2<math>\Delta</math></i>   |
| <i>gpa2<math>\Delta</math></i>   | <i>MAT<math>\alpha</math></i> , <i>MAT<math>\alpha</math></i> , <i>his3<math>\Delta</math></i> , <i>leu2<math>\Delta</math></i> , <i>lys2</i> , <i>MET15</i> , <i>ura3<math>\Delta</math></i> , <i>gpa2<math>\Delta</math></i>   |
| <i>rpl31a<math>\Delta</math></i> | <i>MAT<math>\alpha</math></i> , <i>MAT<math>\alpha</math></i> , <i>his3<math>\Delta</math></i> , <i>leu2<math>\Delta</math></i> , <i>lys2</i> , <i>MET15</i> , <i>ura3<math>\Delta</math></i> , <i>rpl31a<math>\Delta</math></i> |

**Table S1. Yeast strains used in this study, Related to Experimental Procedures.** All *S. cerevisiae* strains used have the BY genetic background.

## SUPPLEMENTAL EXPERIMENTAL PROCEDURES

### Experimental characterization of the phenotypic switching rates with flow cytometry:

The phenotypic switching rates between the OFF and ON states of the bimodal GAL network is extracted from experimental FACS data as previously described (Acar et al., 2008; Peng et al., 2015). For this, the experimentally-obtained number of ON and OFF cells,  $N_{OFF}$  and  $N_{ON}$ , are fed into the following coupled differential equations:

$$\begin{cases} \frac{dN_{ON}}{dt} = \gamma N_{ON} - r_{OFF} N_{ON} + r_{ON} N_{OFF} \\ \frac{dN_{OFF}}{dt} = \gamma N_{OFF} + r_{OFF} N_{ON} - r_{ON} N_{OFF} \end{cases}$$

where  $\gamma$  is the growth rate of the cells, and  $r_{OFF}$  and  $r_{ON}$  are the ON-to-OFF and OFF-to-ON switching rates, respectively. These differential equations were solved analytically to obtain the fraction of ON cells,  $f_{ON}$ :

$$f_{ON}(t) = \frac{r_{ON}}{r_{ON} + r_{OFF}} + \left( f_{ON}(t=0) - \frac{r_{ON}}{r_{ON} + r_{OFF}} \right) e^{-(r_{ON} + r_{OFF})t}$$

Using two different initial states  $f_{ON}(t=0)$  and the corresponding final states after 22 hours  $f_{ON}(t=22h)$ , we numerically solved the above equation for  $r_{OFF}$  and  $r_{ON}$ . The two different initial states were experimentally obtained by growing yeast cells in duplicate in [0.5% glucose (OFF history)] or [0.5% glucose + 2% galactose (ON history)] respectively for 22 hours, and the fraction of ON cells were measured using FACS. The cells were then grown in induction media, consisting of [0.5% glucose + 2% galactose], for another 22 hours, and the post-induction fraction of ON cells were measured using FACS. A cutoff for ON cells was selected based on FACS measurements performed on uninduced cells (i.e., without galactose). The experimental  $f_{ON}$  results obtained from these measurements were used to solve the above equation for  $r_{OFF}$  and  $r_{ON}$ . The following table shows the results obtained from our measurements.

|                |              |                                   |                           |
|----------------|--------------|-----------------------------------|---------------------------|
| OFF history    | experiment 1 | $f_{ON}(t=0) = 0\%$               | $f_{ON}(t=22h) = 10.15\%$ |
| OFF history    | experiment 2 | $f_{ON}(t=0) = 0\%$               | $f_{ON}(t=22h) = 8.8\%$   |
| OFF history    | average 1&2  | $f_{ON}(t=0) = 0\%$               | $f_{ON}(t=22h) = 9.47\%$  |
|                |              |                                   |                           |
| ON history     | experiment 1 | $f_{ON}(t=0) = 19.73\%$           | $f_{ON}(t=22h) = 30.37\%$ |
| ON history     | experiment 2 | $f_{ON}(t=0) = 19.69\%$           | $f_{ON}(t=22h) = 31.98\%$ |
| ON history     | average 1&2  | $f_{ON}(t=0) = 19.71\%$           | $f_{ON}(t=22h) = 31.17\%$ |
|                |              |                                   |                           |
| Switching rate | ON => OFF    | $r_{OFF} = 1.2 * 10^{-12} h^{-1}$ |                           |
| Switching rate | OFF => ON    | $r_{ON} = 0.0055 h^{-1}$          |                           |
